# Supplementary material for: Improving the photovoltaic performance of planar heterojunction perovskite solar cells by mixed solvent vapor treatment
Source: Royal Society of Chemistry journal article supplement (doi:10.1039/c7ra13289a), 2018-01-01
Supplement: c7ra13289a1.pdf [file c7ra13289a1.pdf]

## Supporting Information

# Improving the photovoltaic performance of planar heterojunction perovskite solar cells by mixed solvent vapor treatment

Binbin Yuan,<sup>a,b</sup> Suling Zhao,<sup>\*,a,b</sup> Zheng Xu,<sup>a,b</sup> Dandan Song,<sup>a,b</sup> Bo Qiao,<sup>a,b</sup> Yang Li,<sup>a,b</sup>

Zilun Qin,<sup>a,b</sup> Juan Meng,<sup>a,b</sup> and Xurong Xu<sup>a,b</sup>

<sup>a</sup> Key Laboratory of Luminescence and Optical Information (Beijing Jiaotong University), Ministry of Education, Beijing 100044, China

<sup>b</sup> Institute of Optoelectronics Technology, Beijing Jiaotong University, Beijing 100044, China

\*: Corresponding Author

E-mail: slzhao@bjtu.edu.cn

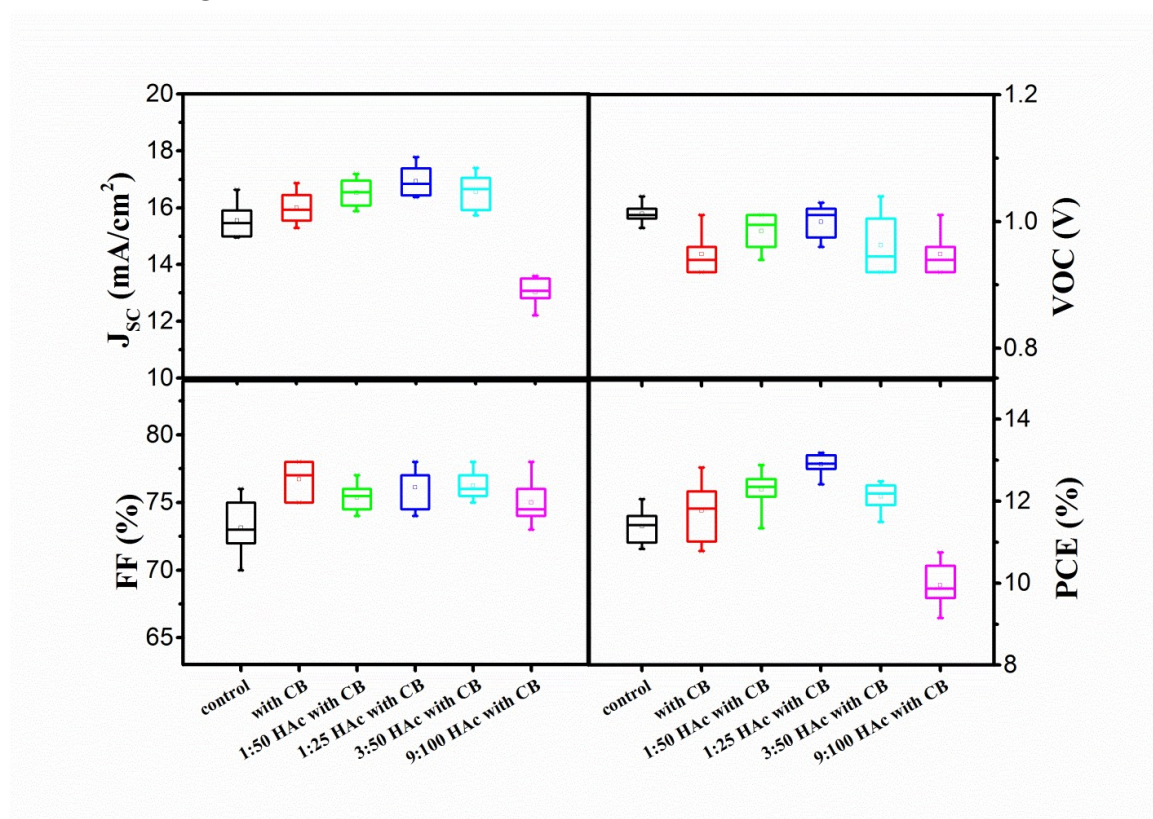

**Fig. S1** Statistical data of photovoltaic parameters comparison about MAPbI<sub>3</sub> film were treated without and with various volume ratios HAC/CB.

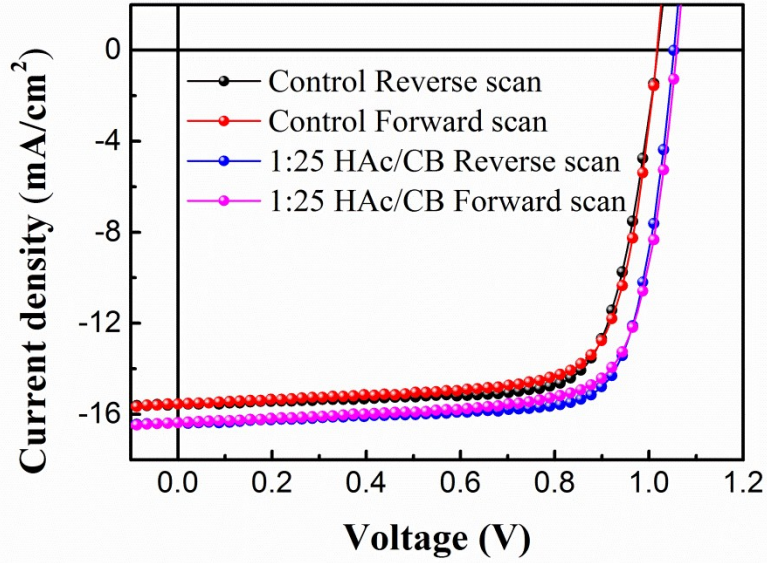

**Fig. S2** The J-V characteristic of PSCs obtained by sweeping the voltage from forward to reverse and from reverse to forward bias with different treatment.

**Table S1** Photovoltaic properties of PSCs extracted from Figure S2.

| Annealing parameters | Scan direction | Jsc(mA/cm <sup>2</sup> ) | Voc(V) | FF(%) | PCE(%) |
|----------------------|----------------|--------------------------|--------|-------|--------|
| Control              | Reverse        | 15.53                    | 1.02   | 76    | 12.05  |
|                      | Forward        | 15.57                    | 1.02   | 74    | 11.80  |
| 1:25 HAc/CB          | Reverse        | 16.35                    | 1.04   | 77    | 13.15  |
|                      | Forward        | 16.38                    | 1.05   | 74    | 12.87  |

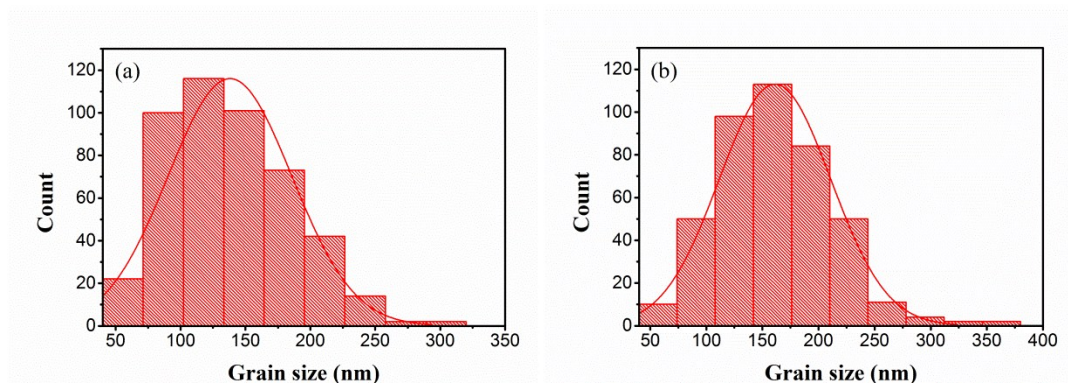

**Fig. S3** The histograms of perovskite grain size (a) and (b) were on ITO/glass by counting the nano measurer software. MAPbI<sub>3</sub> films were treated without and with 1/25 volume ratios HAc/CB, respectively.

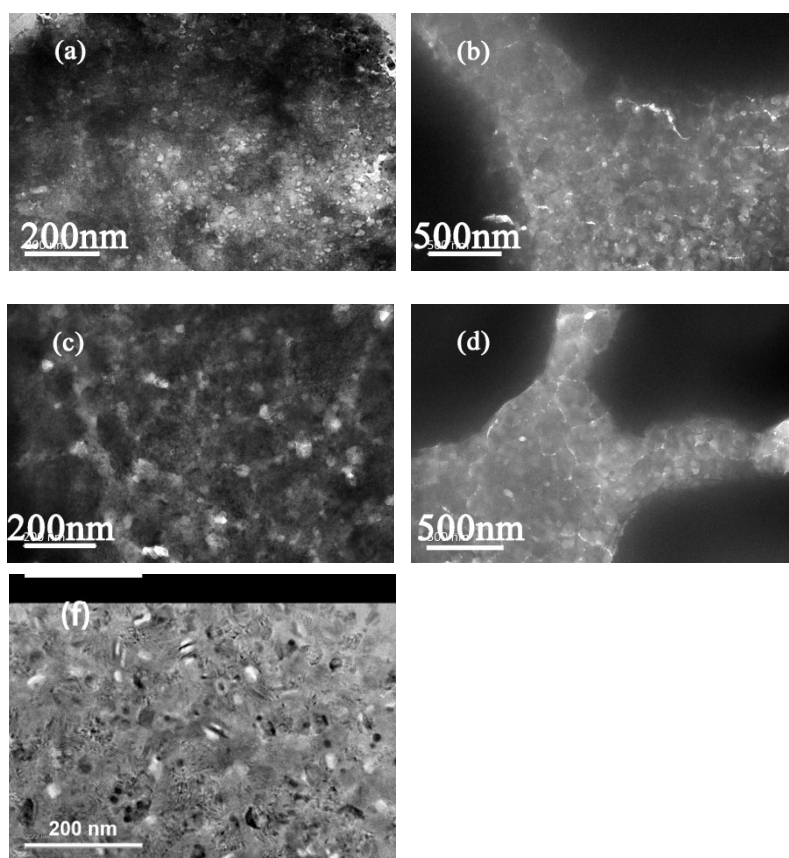

**Fig. S4** The HRTEM figures of perovskite thin film (a), (b), (c), (d), (f) were on carbon-film-coated TEM grid. (a) and (b) MAPbI<sub>3</sub> films were treated without HAC/CB; (c) and (d) MAPbI<sub>3</sub> films were treated with 1/25 volume ratios HAC/CB; (f) TEM image of perovskite thin film was reported by others in reference 1.

The efficacy of this TEM-specimen preparation method has been confirmed in previous studies.<sup>1-3</sup> MAPbI<sub>3</sub> Perovskite films directly deposited on the TEM grid show much smaller grain size and multiple layers of grains,<sup>1</sup> It is notoriously difficult to distinguish clearly grain boundaries.

1. F. Ji, S. Pang, L. Zhang, Y. Zong, G. Cui, N. P. Padture and Y. Zhou, *ACS Energy Letters*, 2017, **2**, 2727-2733.
2. M. U. Rothmann, W. Li, Y. Zhu, U. Bach, L. Spiccia, J. Etheridge and Y.-B. Cheng, *Nature communications*, 2017, **8**, 14547.
3. Y. Zhou, A. L. Vasiliev, W. Wu, M. Yang, S. Pang, K. Zhu and N. P. Padture, *The journal of physical chemistry letters*, 2015, **6**, 2292-2297.
